# Supplementary material for: A lipid membrane supported on an artificial extracellular matrix made of polyelectrolyte multilayers: towards nanoarchitectonics at the cellular interface
Source: Royal Society of Chemistry journal article supplement (doi:10.1039/d2nr05186a), 2022-12-19
Supplement: d2nr05186a1.pdf [file d2nr05186a1.pdf]

## Supporting Information for

### Lipid membrane supported on artificial extracellular matrix made of polyelectrolyte multilayers: towards nanoarchitectonics of cellular interface

Anna Vikulina,<sup>a,b</sup> Alena Wulf,<sup>a</sup> Guy Guday,<sup>a</sup> Rawil Fakhrullin<sup>c\*</sup> and Dmitry Volodkin<sup>d\*</sup>

*Fraunhofer Institute for Cell Therapy and Immunology, Branch Bioanalytics and Bioprocesses (Fraunhofer IZI-BB), Am Mühlenberg 13, 14476 Potsdam, Germany*

<sup>b</sup> *Friedrich-Alexander-Universität Erlangen-Nürnberg (FAU), Bavarian Polymer Institute, Dr.-Mack-Straße 77, 90762 Fürth, Germany.*

<sup>c</sup> *Kazan Federal University, Institute of Fundamental Medicine and Biology, Kreml uramı 18, Kazan, Republic of Tatarstan, 420008, Russian Federation. \*[kazanbio@gmail.com](mailto:kazanbio@gmail.com)*

<sup>d</sup> *Nottingham Trent University, School of Science and Technology, Clifton Lane, Nottingham NG11 8NS, UK, \*[dmitry.volodkin@ntu.ac.uk](mailto:dmitry.volodkin@ntu.ac.uk)*

**Abbreviations:** HA - sodium hyaluronate, PLL - poly-L-lysine, PEM – polyelectrolyte multilayers, POPC - 2-oleoyl-1-palmitoyl-sn-glycero-3-phosphocholine, POPG - 2-oleoyl-1-palmitoyl-sn-glycero-3-phospho-rac-(1-glycerol) sodium salt, NBD-DMPE - N-(NBD-aminododecanoyl)-1,2-ditetradecanoyl-sn-glycero-3-phosphoethanolamine sodium salt. The liposomes POPC/POPG/Cholesterol/NBD-DMPE 7/2/1/0.5<sub>w</sub> and POPC/Cholesterol/NBD-DMPE 9/1/0.5<sub>w</sub> are referred as PC-PG<sup>NBD</sup> and PC<sup>NBD</sup> liposomes, respectively.

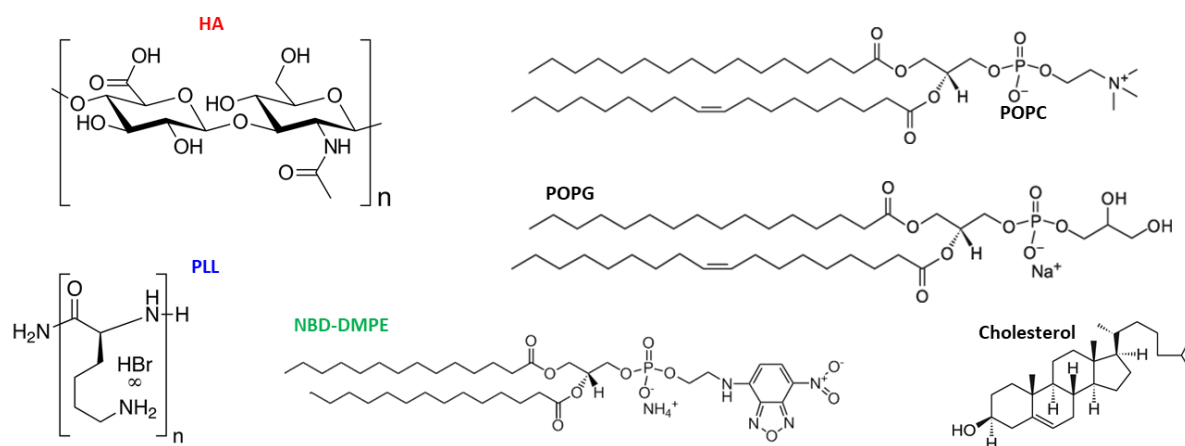

**Figure S1.** Chemical structures of the lipids and polymers used in this study.

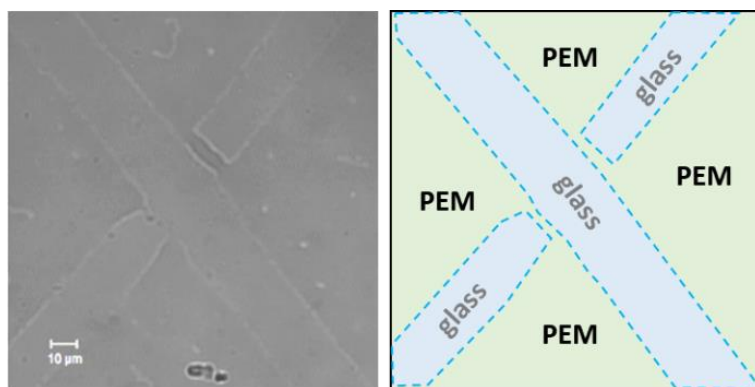

**Figure S2.** Light transmittance image of (HA/PLL)<sub>24</sub> film deposited on the glass coverslip and cross-scratched with the needle. Scratched areas represent uncoated glass surface as a control for each experiment.

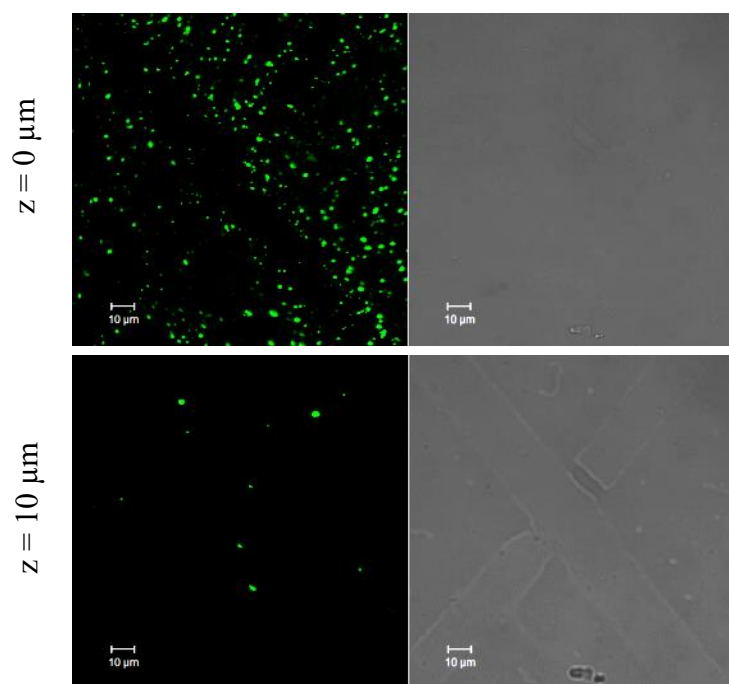

**Figure S3.** Confocal and light transmittance images of (HA/PLL)<sub>28</sub>)<sub>24</sub> film incubated with 50 μM (total lipids) PC-PG<sup>NBD</sup> liposome suspension at different  $z$ -distances from the top of the film. At  $z = 0$  μm, the scratch is in focus. Plenty of PC-PG<sup>NBD</sup> liposome aggregates is clearly seen. At  $z = 10$  μm, the scratch is out of focus. The aggregates of PC-PG<sup>NBD</sup> liposomes are also clearly seen in a lower amount, likely due to their fast sedimentation.

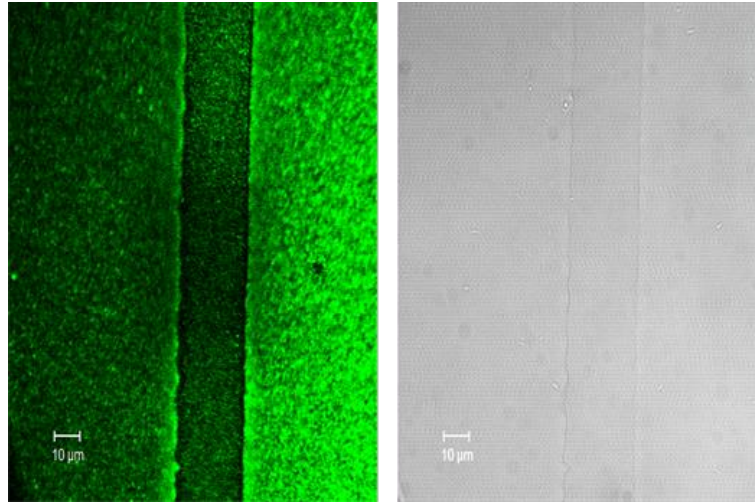

**Figure S4.** CLSM images of (HA/PLL280)<sub>24</sub> multilayers planar films incubated with the suspension of PC<sup>NBD</sup> liposomes (50 µM total lipids in Tris buffer solution pH 7.4) for 20 minutes.

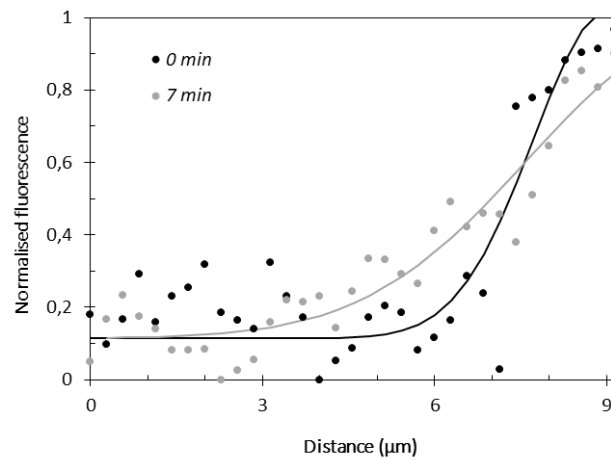

**Figure S5.** Normalized PE-NBD fluorescence profiles after photobleaching (black) and after 7 minutes after the fluorescence recovery (grey) fitted with Gaussian function (half-Gaussians are shown). Lipid coating was supported on (HA/PLL280)<sub>24</sub> multilayers by their incubation with the suspension of PC-PG<sup>NBD</sup> liposomes (50 µM total lipids in Tris buffer solution pH 7.4) for 20 minutes.

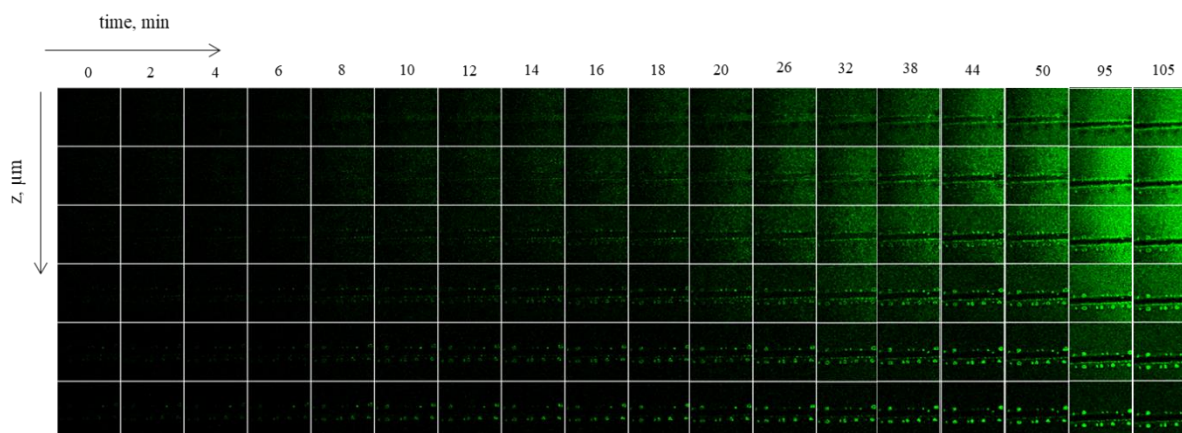

**Figure S6.** Confocal images of (HA/PLL280)<sub>24</sub> multilayer film at different time points and at different distance (z) from the surface of the multilayers after addition of 50  $\mu$ M (total lipids) PC-PG<sup>NBD</sup> liposome suspension in Tris buffer pH 7.4. Each image is 145 $\times$ 145  $\mu$ m.

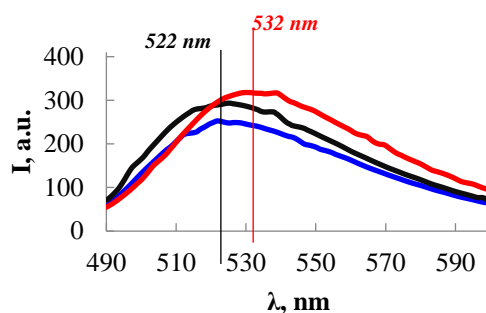

**Figure S7.** Emission spectra of PC-PG<sup>NBD</sup> non-reacted with PEMs (red) and after incubation with (HA/PLL<sub>280</sub>)<sub>24</sub> multilayers for 15 (black) and 120 minutes (blue).

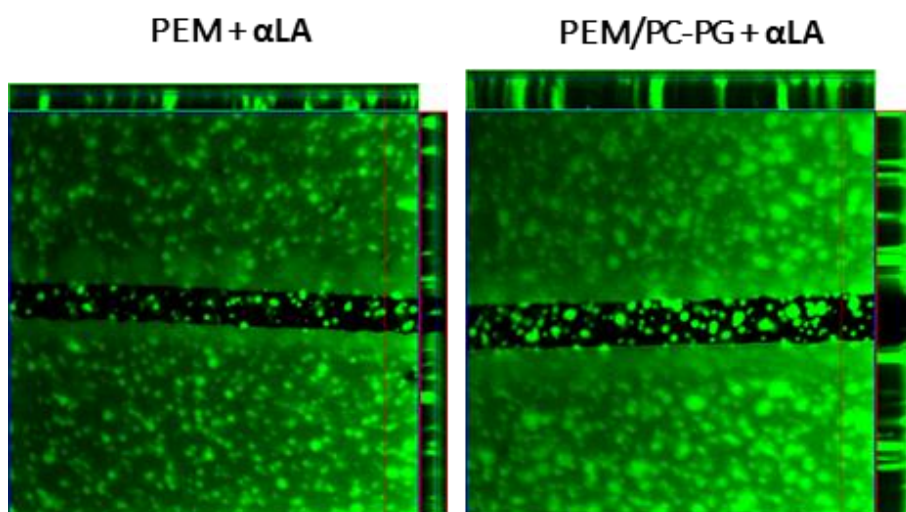

**Figure S8.** Confocal images of uncoated (HA/PLL280)<sub>24</sub> multilayers (left) and (HA/PLL280)<sub>24</sub> coated with PC-PG liposomes (right) after incubation with  $\alpha$ -lactalbumin-FITC for 30 minutes. Incubation medium: Tris buffer solution pH 7.4. Each image is 145 $\times$ 145  $\mu$ m.
